# Supplementary material
Source: ML conference proceedings conference paper supplement (https://aclanthology.org/P17-1095)

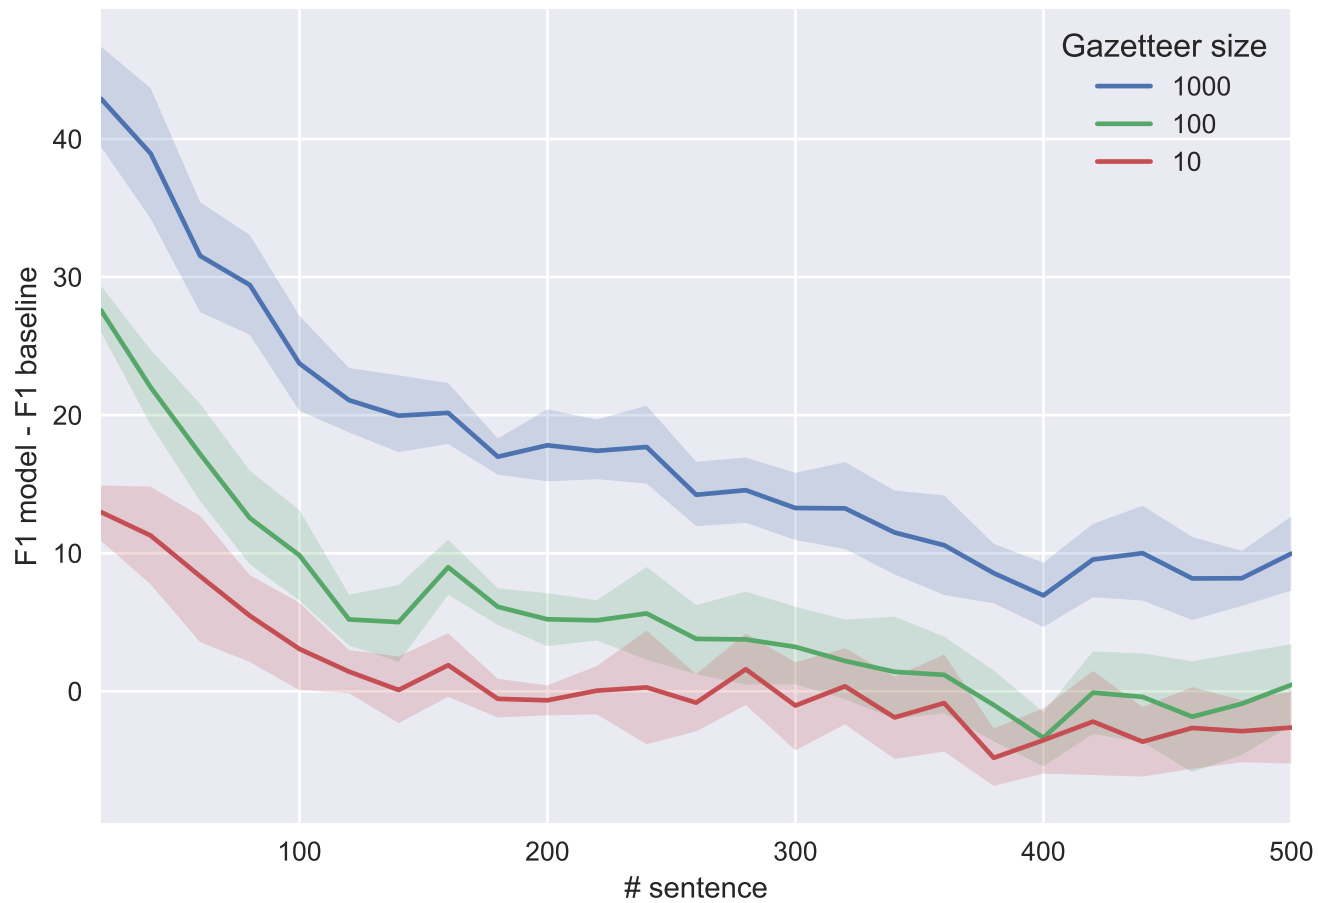

Supplement: Notes [file uzbek_delta_500.pdf › uzbek_delta_500.pdf]

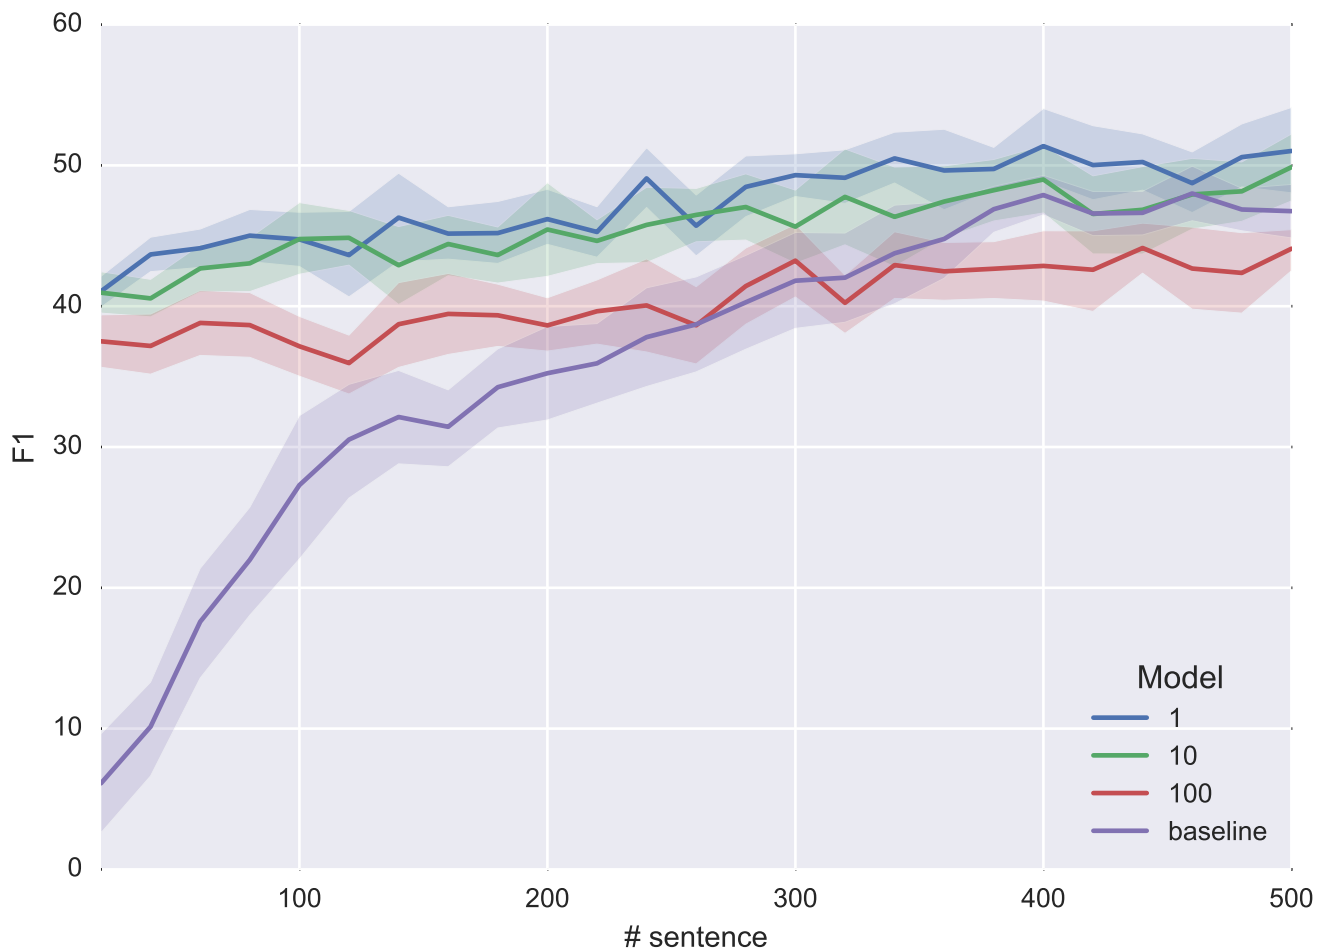

Supplement: Notes [file uzbek_pseudosweep_500.pdf › uzbek_pseudosweep_500.pdf]
